# Supplementary material for: MnOx-decorated MOF-derived nickel–cobalt bimetallic phosphide nanosheet arrays for overall water splitting
Source: Royal Society of Chemistry journal article supplement (doi:10.1039/d3dt03631f), 2023-12-15
Supplement: d3dt03631f1.pdf [file d3dt03631f1.pdf]

## Electronic Supplementary Information

### **MnO<sub>x</sub>-decorated MOF-derived nickel-cobalt bimetallic phosphides nanosheet arrays for overall water splitting**

*Zheng Zhang,<sup>a</sup> Lei Han,<sup>a</sup> and Kai Tao<sup>a\*</sup>*

<sup>a</sup> School of Materials Science & Chemical Engineering, Ningbo University, Ningbo, Zhejiang 315211, P. R. China.

E-mail: taokai@nbu.edu.cn

#### **Fabrication of control NiCo-LDH nanosheets on NF (NiCo-LDH-con/NF):**

First, 0.291g Co(NO<sub>3</sub>)<sub>2</sub> • 6H<sub>2</sub>O, 0.291g Ni(NO<sub>3</sub>)<sub>2</sub> • 6H<sub>2</sub>O, 0.3g urea and 0.092g NH<sub>4</sub>F were dissolved in 30 mL DI water to form the solution. Then, the solution was transferred to a 50 mL autoclave. Subsequently NF (2\*3 cm<sup>2</sup>) was placed into the solution as a conductive substrate and heated at 120 °C for 6 h. After cooling to room temperature, the NiCo-LDH-con/NF was obtained.

#### **Characterization**

The crystalline structure of the sample was characterized with X-ray diffractometer (Bruker AXS D8 Advance). The compositions and microstructures of the samples were analyzed by field emission scanning electron microscope (FESEM, Hitachi S-4800) and transmission electron microscope (TEM, FEI Talos F200x) equipped with an energy dispersive X-ray spectrometer (EDS). X-ray photoelectron spectroscopy (XPS) measurements were performed using a Thermo Scientific K-Alpha spectrometer.

#### **Electrochemical measurements**

All electrochemical measurements were carried out by using a CHI660E electrochemical workstation in 1.0 M KOH with a three-electrode system, where the

as-prepared samples (geometric area: 1.0 cm<sup>2</sup>), Pt mesh (1 cm×1 cm) and an Hg/HgO electrode were used as working, counter and reference electrode, respectively. All measured potentials were converted to potentials vs reversible hydrogen electrode (RHE):  $E_{\text{RHE}} = E_{\text{Hg/HgO}} + 0.0592 \times \text{pH} + 0.098$ . Linear sweep voltammetry (LSV) was carried out at a scan rate of 2 mV s<sup>-1</sup>, after the sample was activated by 150 cyclic voltammetry (CV) cycles (with a scan rate of 50 mV s<sup>-1</sup>). All polarization curves were iR-corrected according to:  $E_{\text{corr}} = E_{\text{m}} - iR_{\text{s}}$ , where  $E_{\text{corr}}$  was iR-corrected potential,  $E_{\text{m}}$  was experimentally measured potential, and  $R_{\text{s}}$  was the equivalent series resistance obtained from the electrochemical impedance spectroscopy (EIS) measurement. The Tafel plots were determined from LSV at 2 mV s<sup>-1</sup> with 100% iR corrected and the slopes were calculated based on the equation:  $\eta = b \log j + a$  where  $\eta$ ,  $b$  and  $j$  are the overpotential, Tafel slope and current density, respectively. The EIS measurements for HER and OER are performed at frequencies ranging from 100 kHz to 0.1 Hz with potentials of -0.2 and 1.53 V, respectively. Double-layer capacitances were calculated from CV curves with various scan rates ranging from 20 to 100 mV s<sup>-1</sup>. The stability of the electrode was evaluated by chronopotentiometry at different current densities. Bubbling method which recording data of the rising volume  $V$  (mL) of the soap bubble and the total number of charges transferred under constant current (250 mA cm<sup>-2</sup>) was measured to calculate the Faraday efficiency (FE). ( $\text{FE} = 4 * F * V / (1000 * V_{\text{m}} * It)$ ). Where  $F$  was the Faraday constant (96485 C mol<sup>-1</sup>),  $V$  is the volume change of oxygen or H<sub>2</sub> production (mL) and  $V_{\text{m}}$  was the molar volume (molar under normal temperature and pressure, 24.5 L mol<sup>-1</sup>). In a closed h-shaped electrolytic cell, H<sub>2</sub>/O<sub>2</sub> gas production was measured via the drainage method. During 25 min of continuous electrolysis, the amount of water emitted by the anode and cathode was recorded every 5 min, and the volume of H<sub>2</sub>/O<sub>2</sub> was subsequently recorded and compared with theoretical values as derived from the charge-time curve.

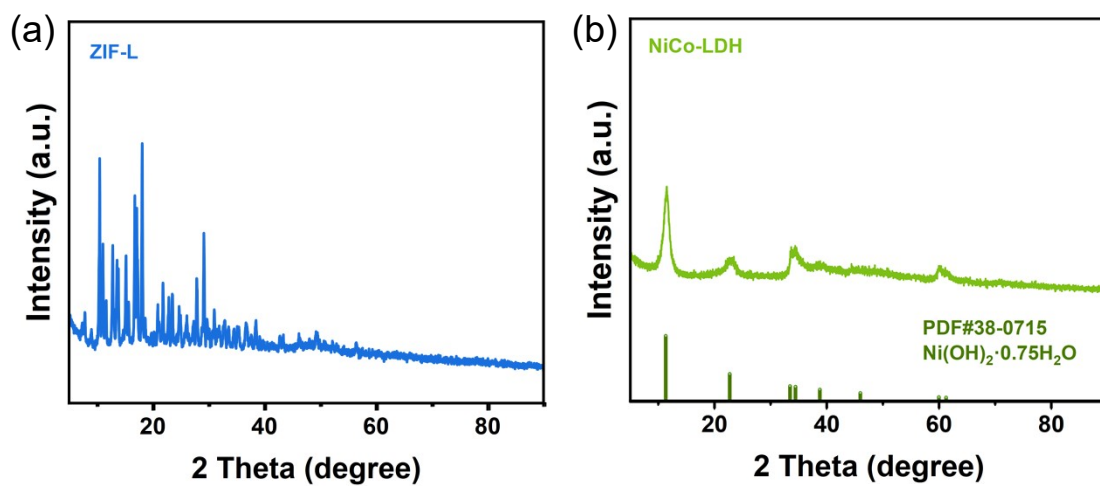

**Figure S1.** XRD patterns of (a) ZIF-L and (b) NiCo-LDH nanosheets.

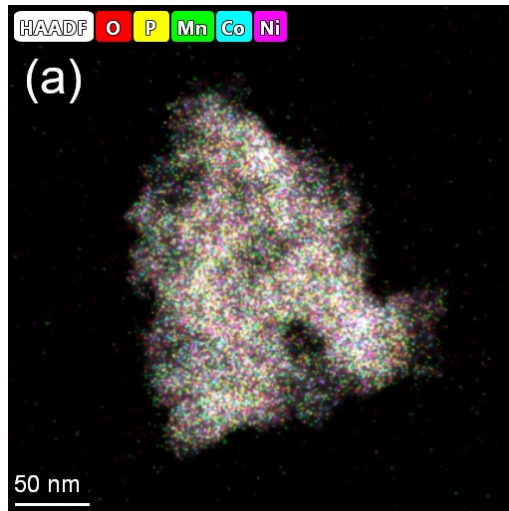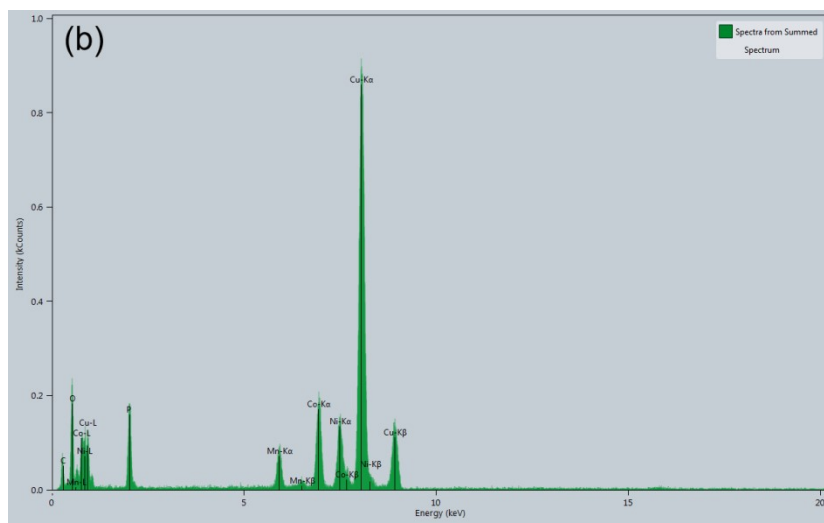

**Figure S2.** (a) HAADF image and (b) EDS pattern of MnO<sub>x</sub>/NiCoP/NF.

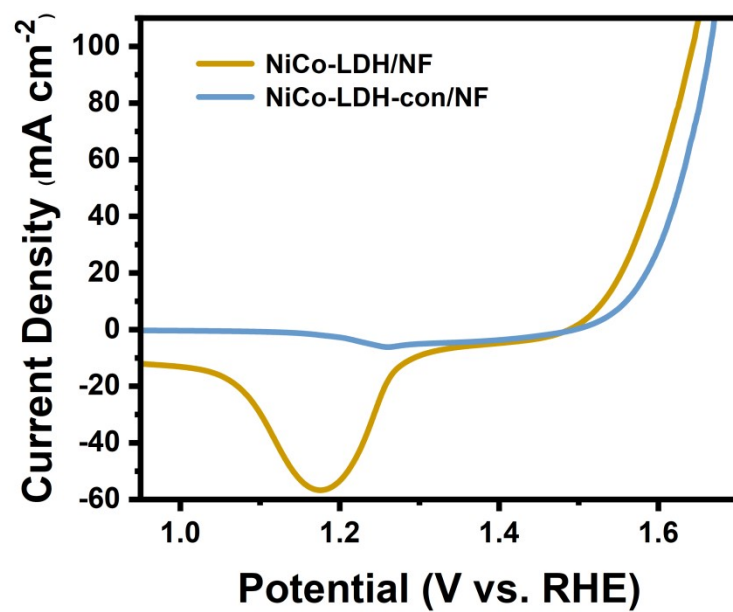

**Figure S3.** Comparison of the OER catalytic performance of MOFs-derived NiCo-LDH/NF and NiCo-LDH-con/NF prepared by a conventional hydrothermal method.

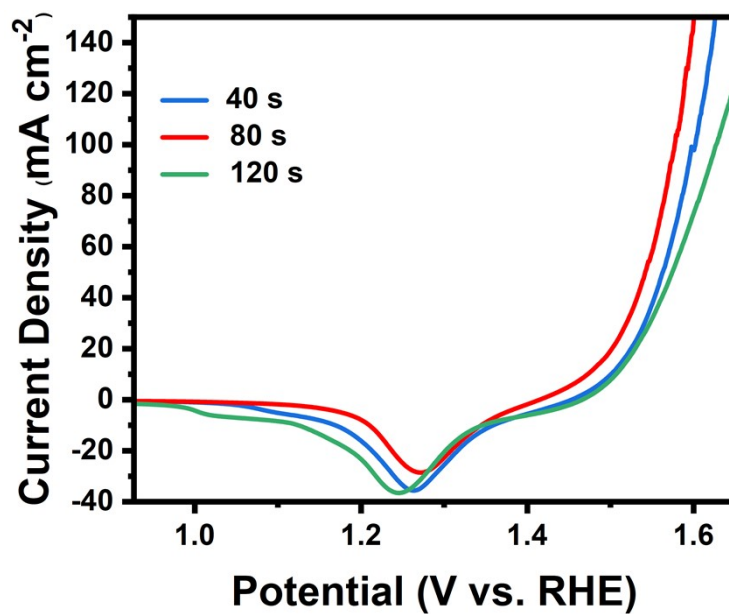

**Figure S4.** OER LSV curves of MnO<sub>x</sub>/NiCoP/NF with different electrodeposition times.

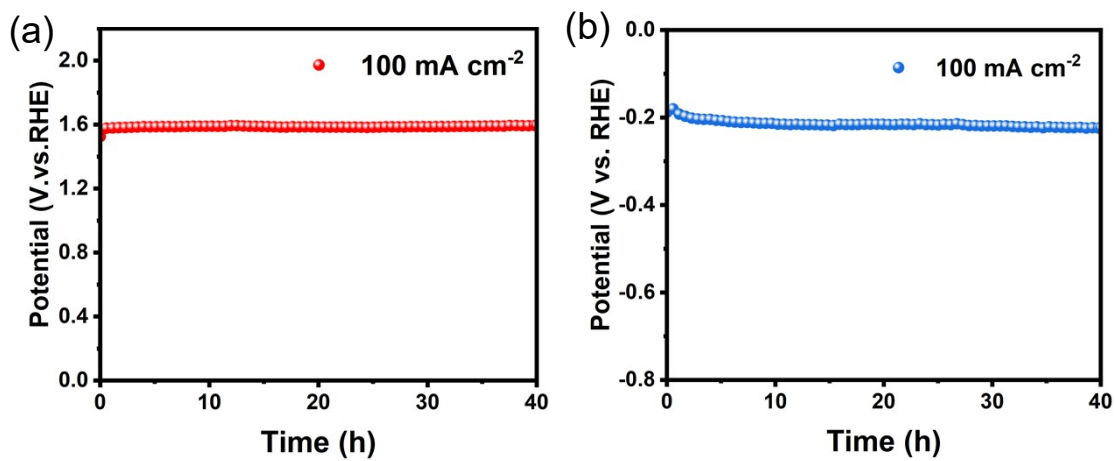

**Figure S5.** Durability test of (a) OER and (b) HER at 100 mA cm<sup>-2</sup>.

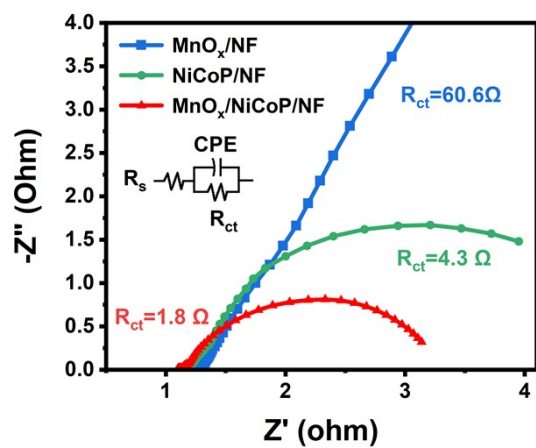

Figure S6. Nyquist plots for HER



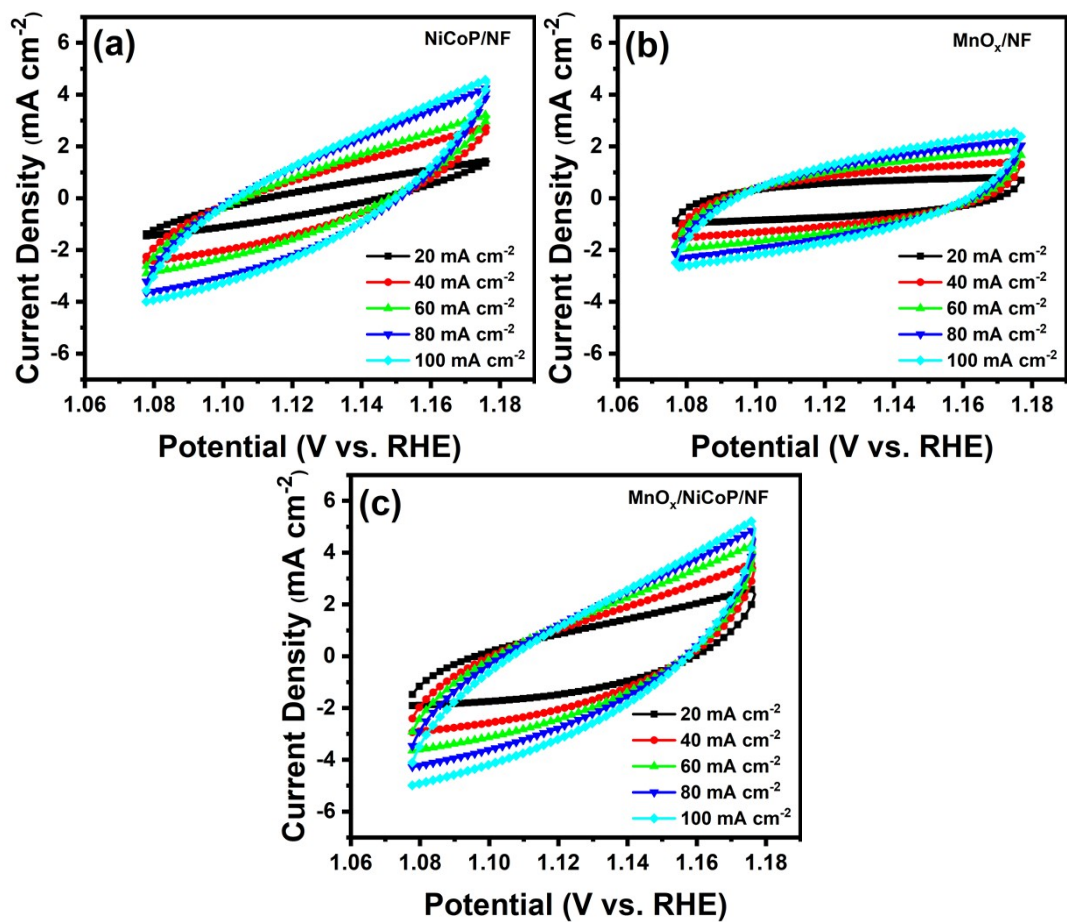

**Figure S7.** CV curves in the region of 1.0768V-1.1768V for (a) NiCoP/NF, (b) MnO<sub>x</sub>/NF and (c) MnO<sub>x</sub>/NiCoP/NF at various scan rates for OER.

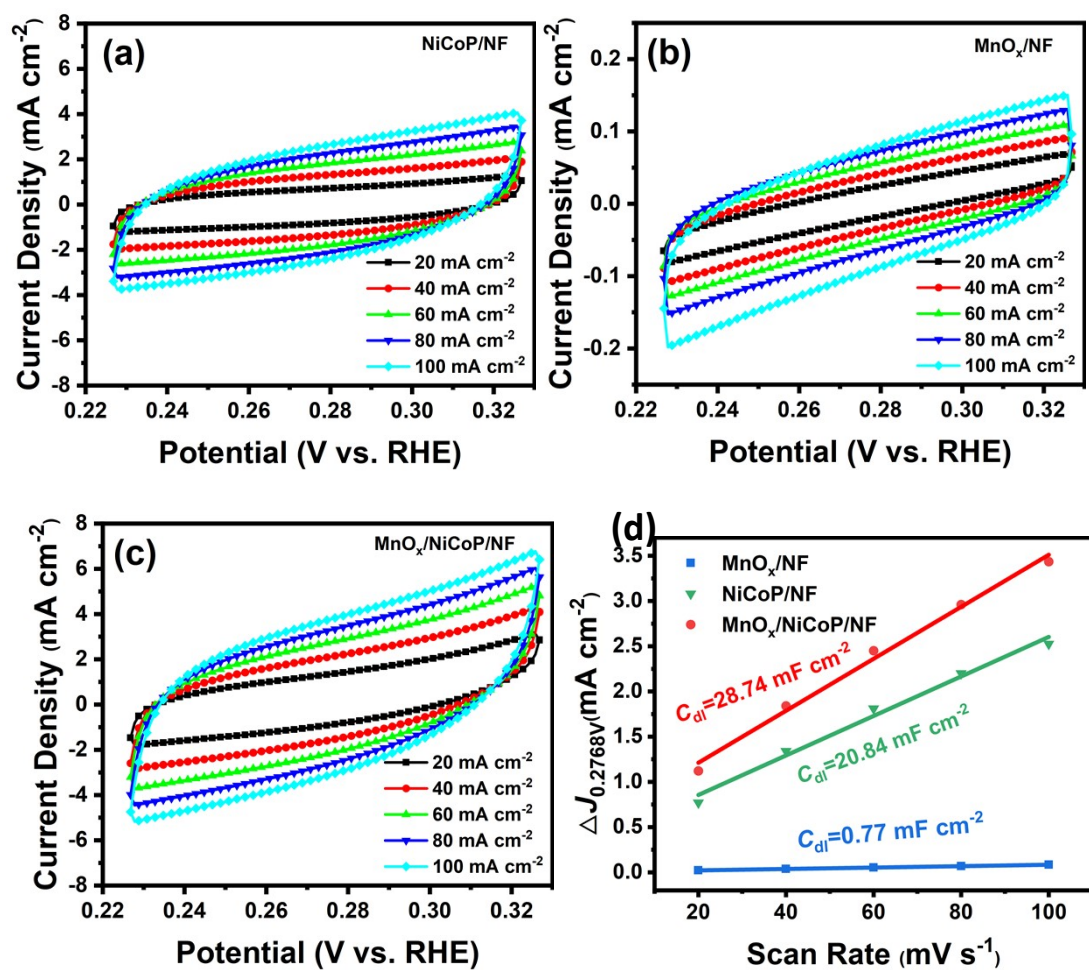

**Figure S8.** CV curves in the region of 0.2268V-0.3268V for (a) NiCoP/NF, (b) MnO<sub>x</sub>/NF and (c) MnO<sub>x</sub>/NiCoP/NF at various scan rates. (d)  $\Delta J$  at 0.2768 V as a function of scan rate for HER.

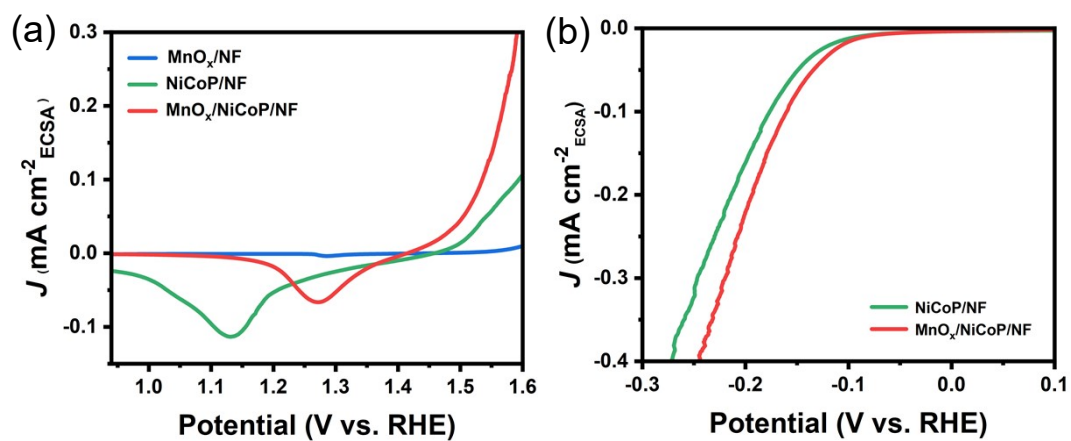

**Figure S9.** (a) OER LSV curves standardized by ECSA, and (b) HER LSV curves standardized by ECSA.

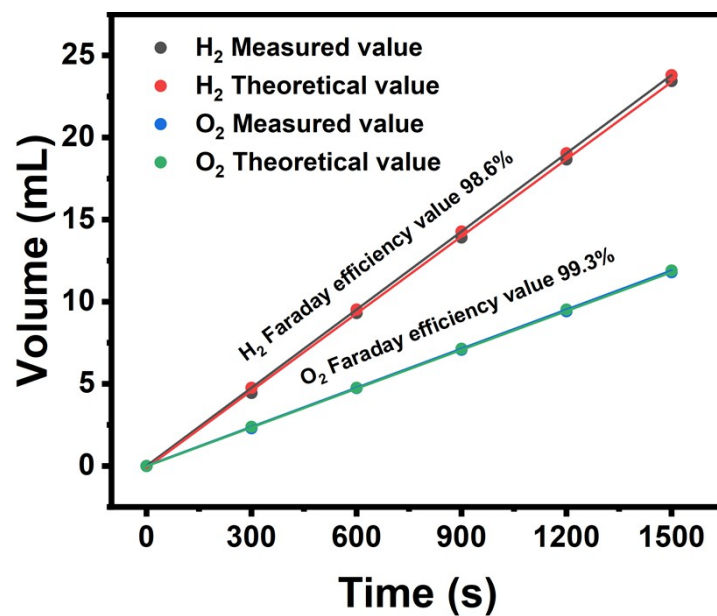

**Figure. S10.** Hydrogen efficiency and oxygen efficiency of MnO<sub>x</sub>/NiCoP/NF||MnO<sub>x</sub>/NiCoP/NF under current density of 250 mA cm<sup>-2</sup> in 1 M KOH.

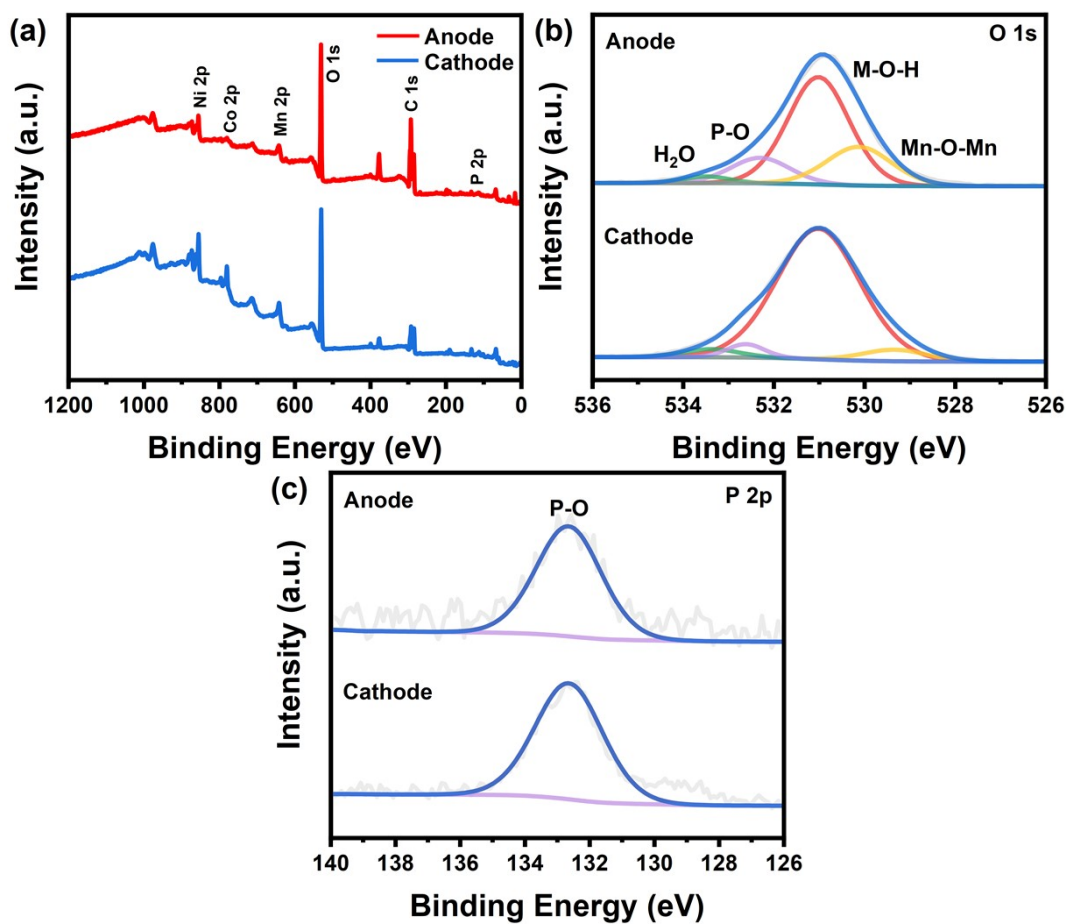

**Figure. S11.** (a) The survey XPS spectra, and corresponding high-resolution XPS spectra of (b) O 1s and (c) P 2p of MnO<sub>x</sub>/NiCoP/NF as the cathode and anode after the chronopotentiometry measurement for overall water splitting.

**Table S1.**Element content and composition

| Element | Atomic Fraction (%) | Mass Fraction (%) |
|---------|---------------------|-------------------|
| O K     | 33.11               | 13.46             |
| P K     | 17.83               | 14.03             |
| Mn K    | 8.53                | 11.91             |
| Co K    | 21.81               | 32.67             |
| Ni K    | 18.72               | 27.92             |

**TableS2.** Comparison of the OER activity of MnO<sub>x</sub>/NiCoP/NF with other non-noble metal electrocatalysts in alkaline solution.

| <b>Electrocatalyst</b>               | <b>j (mA·cm<sup>-2</sup>)</b> | <b>η(mV)</b> | <b>Electrolyte</b> | <b>Ref.</b> |
|--------------------------------------|-------------------------------|--------------|--------------------|-------------|
| MnO <sub>x</sub> /NiCoP/NF           | 10                            | 240          | 1M KOH             | This work   |
| NiCo <sub>2-x</sub> FeO <sub>4</sub> | 10                            | 274          | 1M KOH             | 1           |
| NiCoP/NF                             | 10                            | 280          | 1M KOH             | 2           |
| NiFeP/NF                             | 10                            | 264          | 1M KOH             | 3           |
| NiCoP/CC                             | 10                            | 242          | 1M KOH             | 4           |
| WCoFe/NF                             | 10                            | 250          | 1M KOH             | 5           |

**TableS3.** Comparison of the HER activity of MnO<sub>x</sub>/NiCoP/NF with other non-noble metal electrocatalysts in alkaline solution.

| <b>Electrocatalyst</b>     | <b>j (mA·cm<sup>-2</sup>)</b> | <b>η(mV)</b> | <b>Electrolyte</b> | <b>Ref.</b> |
|----------------------------|-------------------------------|--------------|--------------------|-------------|
| MnO <sub>x</sub> /NiCoP/NF | 10                            | 93           | 1M KOH             | This work   |
| Ni <sub>2</sub> P/Co       | 10                            | 149          | 1M KOH             | 6           |
| CoP/NCNHP                  | 10                            | 115          | 1M KOH             | 7           |
| CoP/Ni <sub>2</sub> P      | 10                            | 143          | 1M KOH             | 8           |
| CoP/NPC/TF                 | 10                            | 118          | 1M KOH             | 9           |
| N-C@CoP/Ni <sub>2</sub> P  | 10                            | 176          | 1M KOH             | 10          |



**TableS4.** Comparison of the overall water splitting activity of MnO<sub>x</sub>/NiCoP/NF with other non-noble metal electrocatalysts in alkaline solution.

| <b>Electrocatalyst</b>                                                | <b>j (mA·cm<sup>-2</sup>)</b> | <b>η(V)</b> | <b>Electrolyte</b> | <b>Ref.</b> |
|-----------------------------------------------------------------------|-------------------------------|-------------|--------------------|-------------|
| MnO <sub>x</sub> /NiCoP/NF                                            | 10                            | 1.59        | 1M KOH             | This work   |
| Co <sub>2</sub> P <sub>-x</sub> /Ni <sub>2</sub> P <sub>-y</sub> @ NF | 10                            | 1.63        | 1M KOH             | 11          |
| Co-P                                                                  | 10                            | 1.64        | 1M KOH             | 12          |
| MnCo <sub>2</sub> O <sub>4</sub> @Ni <sub>2</sub> P/NF                | 10                            | 1.63        | 1M KOH             | 13          |
| NiCoFeP/C                                                             | 10                            | 1.60        | 1M KOH             | 14          |
| NiCo <sub>2</sub> S <sub>4</sub> NW/NF                                | 10                            | 1.63        | 1M KOH             | 15          |

## References

1. Huang, Y.; Zhang, S. L.; Lu, X. F.; Wu, Z. P.; Luan, D.; Lou, X. W. D., Trimetallic Spinel NiCo(2-x) Fe(x) O(4) Nanoboxes for Highly Efficient Electrocatalytic Oxygen Evolution. *Angew Chem Int Ed Engl*, **2021**, *60*, 11841-11846.
2. Liang, H.; Gandi, A. N.; Anjum, D. H.; Wang, X.; Schwingenschlogl, U.; Alshareef, H. N., Plasma-Assisted Synthesis of NiCoP for Efficient Overall Water Splitting. *Nano Lett*, **2016**, *16*, 7718-7725.
3. Huang, H.; Yu, C.; Zhao, C.; Han, X.; Yang, J.; Liu, Z.; Li, S.; Zhang, M.; Qiu, J., Iron-tuned super nickel phosphide microstructures with high activity for electrochemical overall water splitting. *Nano Energy*, **2017**, *34*, 472-480.
4. Du, C.; Yang, L.; Yang, F.; Cheng, G.; Luo, W., Nest-like NiCoP for Highly Efficient Overall Water Splitting. *ACS Catalysis*, **2017**, *7*, 4131-4137.
5. Pi, Y.; Shao, Q.; Wang, P.; Lv, F.; Guo, S.; Guo, J.; Huang, X., Trimetallic Oxyhydroxide Coraloids for Efficient Oxygen Evolution Electrocatalysis. *Angew Chem Int Ed Engl*, **2017**, *56*, 4502-4506.
6. Li, S.; Zhang, Y.; Yuan, Y.; Chang, F.; Zhu, K.; Li, G.; Bai, Z.; Yang, L., Design and synthesis of dispersed Ni<sub>2</sub>P/Co nano heterojunction as bifunctional electrocatalysis for boosting overall water splitting. *International Journal of Hydrogen Energy*, **2023**, *48*, 3355-3363.
7. Pan, Y.; Sun, K.; Liu, S.; Cao, X.; Wu, K.; Cheong, W. C.; Chen, Z.; Wang, Y.; Li, Y.; Liu, Y.; Wang, D.; Peng, Q.; Chen, C.; Li, Y., Core-Shell ZIF-8@ZIF-67-Derived CoP Nanoparticle-Embedded N-Doped Carbon Nanotube Hollow Polyhedron for Efficient Overall Water Splitting. *J Am Chem Soc*, **2018**, *140*, 2610-2618.
8. Lv, X.; Tian, W.; Liu, Y.; Yuan, Z.-Y., Well-defined CoP/Ni<sub>2</sub>P nanohybrids encapsulated in a nitrogen-doped carbon matrix as advanced multifunctional electrocatalysts for efficient overall water splitting and zinc–air batteries. *Materials Chemistry Frontiers*, **2019**, *3*, 2428-2436.

9. Huang, X.; Xu, X.; Li, C.; Wu, D.; Cheng, D.; Cao, D., Vertical CoP Nanoarray Wrapped by N,P - Doped Carbon for Hydrogen Evolution Reaction in Both Acidic and Alkaline Conditions. *Advanced Energy Materials*, **2019**, *9*, 1803970.
10. Feng, T.; Wang, F.; Xu, Y.; Chang, M.; Jin, X.; Yulin, z.; Piao, J.; Lei, J., CoP/Ni<sub>2</sub>P heteronanoparticles integrated with atomic Co/Ni dual sites for enhanced electrocatalytic performance toward hydrogen evolution. *International Journal of Hydrogen Energy*, **2021**, *46*, 8431-8443.
11. Zhao, H.; Liang, J.; Zhao, Y., Construction of hierarchical Co<sub>2</sub>P/Ni<sub>2</sub>P heterostructures on Ni foam as efficient bifunctional electrocatalyst for overall water splitting. *Journal of Alloys and Compounds*, **2022**, *907*, 164479.
12. Jiang, N.; You, B.; Sheng, M.; Sun, Y., Electrodeposited cobalt-phosphorous-derived films as competent bifunctional catalysts for overall water splitting. *Angew Chem Int Ed Engl*, **2015**, *54*, 6349-6352.
13. Ge, J.; Zhang, W.; Tu, J.; Xia, T.; Chen, S.; Xie, G., Suppressed Jahn-Teller Distortion in MnCo(2) O(4) @Ni(2) P Heterostructures to Promote the Overall Water Splitting. *Small*, **2020**, *16*, 2001856.
14. Wei, X.; Zhang, Y.; He, H.; Peng, L.; Xiao, S.; Yao, S.; Xiao, P., Carbon-incorporated porous honeycomb NiCoFe phosphide nanospheres derived from a MOF precursor for overall water splitting. *Chem Commun (Camb)*, **2019**, *55*, 10896-10899.
15. Sivanantham, A.; Ganesan, P.; Shanmugam, S., Hierarchical NiCo<sub>2</sub>S<sub>4</sub>Nanowire Arrays Supported on Ni Foam: An Efficient and Durable Bifunctional Electrocatalyst for Oxygen and Hydrogen Evolution Reactions. *Advanced Functional Materials*, **2016**, *26*, 4661-4672.
